# Supplementary material for: Quality of life and subjective well-being comparison between traumatic, nontraumatic chronic spinal cord injury, and healthy individuals in China
Source: PeerJ. 2024 Dec 23;12:e18709. doi: 10.7717/peerj.18709 (PMC11670754; doi:10.7717/peerj.18709)
Supplement: Supplemental Information 1 [file peerj-12-18709-s001.xlsx]

## Sheet: Sheet1
	1-How would you rate your quality of life?	2-How satisfied are you with your health?	3-To what extent do you feel that physical pain prevents you from doing what you need to do?	4-How much do you need any medical treatment to function in your daily life?	5-How much do you enjoy life?	6-To what extent do you feel your life to be meaningful?	7-How well are you able to concentrate?	8-How safe do you feel in your daily life?	9-How healthy is your physical environment?	10-Do you have enough energy for everyday life?	11-Are you able to accept your bodily appearance?	12-Have you enough money to meet your needs?	13-How available to you is the information you need in your daily life?	14-To what extent do you have the opportunity for leisure activities?	15How well are you able to get around physically?	16-How satisfied are you with your sleep?	17-How satisfied are you with your ability to perform your daily living activities?	18-How satisfied are you with your capacity for work	19-How satisfied are you with yourself?	20-How satisfied are you with your personal relationships?	21-How satisfied are you with your sex life?	22-How satisfied are you with the support you get from your friends?	23-How satisfied are you with the conditions of your living place?	24-How satisfied are you with your access to health services?	25-How satisfied are you with your transport?	26-How often do you have negative feelings such as blue mood, despair, anxiety or depression?	27-In most ways, my life is close to my ideal.	28-The conditions of my life are excellent.	29-I am satisfied with my life	30-So far, I have gotten the important things I want in life.	31-If I could live my life over, I would change almost nothing.	32-What is your gender?	33-Are you married?	34-How old are you?	35-Level of education?	36-Are you an employee?	37-What is duration since the injury?	38-What is the age of injury?	39-What type of damage?	40-Neurological severity of injury (AIS)	41-What is the level of injury?	42-what is your paralysis type?	43-What was the cause of your injury?	44-What is the state of your injury?
1	1	2	2	2	4	3	4	1	1	1	3	1	2	1	3	2	3	3	3	4	2	3	1	2	3	3	4	2	2	2	2	1	1	3	1	1	1	3	1	1	2	2	4	2
2	4	2	3	2	4	5	5	2	2	2	2	1	2	2	2	3	2	3	2	2	3	2	2	3	3	3	4	4	2	2	6	1	1	4	2	1	1	4	1	1	3	1	4	1
3	3	3	3	3	5	4	5	4	3	3	5	3	3	3	3	3	4	2	5	3	4	2	4	3	4	3	6	6	6	4	1	1	1	3	1	1	2	3	1	4	4	1	4	2
4	2	1	1	2	4	5	5	3	2	1	3	3	2	1	1	2	1	1	3	4	4	3	4	4	3	3	2	2	2	6	4	1	1	4	1	1	1	4	1	3	2	2	4	2
5	5	3	3	3	2	4	2	2	4	3	1	2	2	2	3	2	4	4	3	3	3	3	3	3	3	2	6	6	5	4	6	1	1	4	2	1	1	4	1	1	3	1	1	2
6	3	2	3	2	2	4	2	2	4	2	3	1	2	2	2	4	2	2	4	3	3	3	3	3	3	3	6	5	6	4	6	1	1	4	1	2	1	4	1	3	2	2	4	2
7	4	3	3	2	2	3	3	3	2	3	4	3	3	3	2	3	3	4	4	4	3	4	3	4	3	3	6	6	5	4	4	2	1	4	2	1	1	4	1	3	2	2	4	2
8	1	3	2	2	4	3	4	1	1	1	3	1	2	1	3	2	3	3	5	4	2	3	1	2	3	3	4	2	2	2	2	1	1	4	1	2	1	4	1	2	2	2	3	2
9	1	3	2	2	4	3	4	1	1	1	3	1	2	1	2	3	3	3	4	2	2	1	2	3	3	3	4	2	2	2	2	1	1	4	2	1	1	4	1	3	1	2	3	2
10	1	3	2	2	4	3	4	1	1	3	3	1	2	1	3	2	3	3	3	4	2	3	1	2	3	3	4	2	2	2	2	1	1	4	1	2	1	4	1	3	4	1	2	2
11	5	2	4	4	2	4	2	2	4	2	3	1	2	2	2	4	2	4	4	3	3	3	3	3	3	3	5	5	4	4	6	1	1	4	1	2	1	4	1	3	2	2	3	2
12	4	4	3	2	4	2	3	3	2	3	2	3	4	3	3	2	4	3	2	3	2	4	3	4	3	3	6	6	5	4	4	2	1	3	1	1	1	3	1	1	4	1	1	2
13	4	3	3	2	4	2	3	3	2	3	2	3	4	3	3	2	4	3	4	4	2	2	3	2	3	3	6	6	5	4	4	2	1	3	1	2	1	3	1	1	2	2	2	1
14	1	1	2	2	1	1	1	1	2	1	3	1	3	1	1	2	2	2	2	3	4	2	3	2	2	4	1	1	2	3	7	1	1	4	1	2	1	4	1	1	1	2	3	1
15	4	5	3	2	2	3	3	3	2	3	4	3	2	3	3	2	4	3	4	3	2	4	3	4	3	3	6	6	5	4	4	2	1	4	2	1	1	4	1	1	3	1	4	2
16	2	3	4	2	5	4	5	3	3	2	2	1	3	1	1	1	2	1	3	2	3	2	2	3	2	4	1	1	2	3	7	1	1	4	2	1	1	4	1	1	4	1	4	2
17	4	3	2	2	4	4	4	3	2	2	3	2	4	3	2	3	3	4	4	4	2	3	4	4	4	3	2	2	2	2	2	1	1	4	2	1	1	4	1	3	1	2	3	2
18	4	3	2	2	4	4	3	3	3	2	3	2	3	3	2	3	3	4	4	4	3	4	4	4	4	3	2	2	2	2	2	1	1	4	1	1	1	4	1	2	1	2	1	2
19	3	4	2	3	3	3	3	3	4	2	2	1	2	2	1	2	2	2	3	4	2	2	3	2	2	4	2	3	2	2	4	2	1	3	1	2	1	3	1	1	4	1	4	2
20	2	3	4	2	2	3	3	4	3	2	3	1	3	1	1	1	2	1	5	3	3	3	4	3	3	4	1	1	2	3	4	1	1	3	1	2	2	2	1	3	2	2	4	2
21	5	4	4	4	2	4	2	2	4	2	3	1	2	2	2	4	2	4	3	3	3	2	3	3	3	3	6	4	6	4	5	1	1	3	2	1	1	3	1	2	1	2	3	2
22	4	3	2	2	4	4	3	3	4	2	3	2	3	3	2	3	3	3	4	4	3	4	3	4	4	3	2	2	2	2	2	2	1	4	1	2	1	4	1	2	4	1	3	2
23	2	3	4	2	4	3	5	2	3	1	4	1	4	3	2	1	3	4	2	3	1	2	3	5	3	1	4	3	5	3	6	1	4	4	2	2	1	4	1	2	4	1	1	2
24	4	4	1	3	5	5	4	4	3	1	3	2	3	4	1	3	3	4	4	3	2	2	4	3	4	5	6	6	6	3	6	1	1	4	1	1	1	4	1	2	4	1	3	2
25	2	1	4	2	3	2	4	2	3	1	3	1	5	3	1	1	1	1	1	4	3	4	2	3	3	2	1	1	1	1	1	1	1	4	1	2	1	1	1	1	2	2	3	1
26	4	4	5	3	2	2	3	1	3	3	3	1	5	4	3	3	4	3	3	2	3	2	4	3	4	5	4	3	3	4	1	1	1	4	2	2	1	4	1	3	4	1	3	2
27	4	3	2	3	4	4	3	4	3	4	3	2	3	3	4	2	3	3	4	2	2	3	4	3	4	3	2	3	3	4	4	1	3	4	1	2	2	3	1	2	4	1	2	2
28	4	2	2	2	3	2	2	4	2	2	3	3	2	2	1	4	2	4	4	2	4	2	4	4	4	2	6	6	6	6	6	1	1	4	1	1	1	4	1	2	3	1	4	2
29	1	3	2	2	4	3	4	1	1	1	3	1	2	1	3	2	3	3	3	3	2	3	1	2	3	3	4	2	2	4	2	1	1	4	1	2	1	4	1	2	4	1	3	2
30	3	3	1	2	4	5	5	4	3	3	2	3	3	2	3	3	4	4	4	3	4	3	2	2	3	3	6	6	7	6	6	2	1	4	1	2	1	4	1	1	4	1	4	2
31	3	3	4	2	4	5	5	4	4	3	4	3	4	2	4	4	3	3	4	3	3	4	4	5	4	3	5	5	5	5	4	1	2	1	3	2	2	1	1	3	3	1	4	2
32	3	3	1	3	4	3	4	4	3	2	1	1	2	2	3	4	1	1	2	2	3	4	3	4	1	1	1	4	4	5	7	1	2	1	2	1	1	1	1	2	1	1	3	2
33	3	2	2	2	3	3	3	1	4	3	3	1	3	1	3	4	2	4	4	4	3	5	3	3	2	3	2	4	5	1	7	1	2	4	2	2	2	1	1	2	1	2	3	2
34	4	2	3	3	4	2	5	4	4	3	3	3	4	2	3	3	3	3	4	3	3	2	3	4	2	3	5	5	5	5	4	1	2	1	1	2	1	1	1	1	4	1	3	1
35	4	2	1	2	4	5	5	4	4	3	4	3	4	2	3	4	3	3	4	3	2	1	4	5	4	3	5	5	5	5	4	1	3	2	2	1	1	2	1	1	4	1	3	2
36	3	3	4	3	2	2	2	3	4	3	3	4	2	3	4	3	3	3	3	2	2	3	4	4	4	3	4	6	6	6	4	1	1	1	1	1	1	1	1	1	2	2	3	2
37	4	2	3	2	2	4	2	3	4	2	4	3	3	4	3	5	2	3	2	4	3	4	4	4	1	2	3	2	2	6	6	2	2	1	1	1	1	1	1	1	3	1	1	1
38	3	4	3	2	4	3	3	3	4	4	3	4	3	3	3	4	3	3	3	3	2	2	2	4	3	3	5	5	4	4	3	1	1	2	2	2	1	2	1	3	4	1	4	2
39	3	4	4	2	3	3	4	3	4	2	3	4	3	3	3	4	3	4	3	3	2	2	4	4	4	3	5	5	4	4	3	1	1	2	2	1	1	2	1	3	4	1	2	2
40	2	1	2	2	5	2	5	3	3	3	3	3	2	2	4	3	3	4	4	3	3	3	3	3	2	3	5	5	4	5	4	1	1	2	3	1	1	4	1	2	3	1	3	2
41	3	3	3	2	2	4	4	3	4	2	3	3	3	2	3	3	3	2	4	4	3	3	3	4	2	3	3	3	3	4	3	1	2	2	2	1	1	2	1	2	4	1	3	2
42	3	2	3	2	4	3	4	4	4	2	3	2	3	2	3	4	4	4	4	3	3	4	3	2	3	4	4	4	5	4	4	1	4	2	2	2	1	2	1	3	1	1	4	2
43	3	3	3	2	4	3	4	4	4	2	3	2	3	2	3	4	4	4	4	3	2	2	4	4	3	2	4	4	5	4	4	1	2	2	1	2	1	2	1	2	1	1	3	2
44	3	3	3	2	2	4	4	3	4	2	3	3	3	2	3	3	3	2	4	4	3	3	4	4	4	3	3	3	3	4	2	1	1	2	3	1	1	2	1	4	2	2	3	2
45	4	4	4	3	4	4	3	2	3	4	3	3	3	3	2	4	1	3	4	3	4	4	3	3	4	3	4	4	4	4	7	2	1	4	1	1	2	4	2	2	5	1	4	2
46	2	3	4	2	3	2	4	2	2	3	2	4	3	3	3	3	3	1	1	3	3	4	2	3	3	2	1	5	4	5	3	1	1	4	2	1	1	4	2	3	5	2	4	2
47	2	1	4	2	3	2	4	2	3	1	3	1	2	3	2	3	3	4	1	4	3	3	2	2	3	2	1	5	5	1	4	2	1	4	3	1	1	4	2	3	4	1	4	2
48	4	3	4	3	3	3	3	3	3	4	3	3	3	3	3	4	2	3	4	3	4	4	3	3	4	3	4	4	4	4	7	2	1	3	2	1	1	3	2	2	1	2	4	2
49	3	2	2	3	1	2	2	3	1	1	2	1	1	1	1	3	2	2	3	3	2	3	3	3	3	2	3	2	4	2	2	1	1	4	1	2	1	4	2	3	3	2	4	2
50	4	3	2	2	4	4	3	3	2	2	3	2	3	4	3	3	3	4	4	4	3	4	4	2	4	3	2	2	2	2	2	2	1	4	1	2	1	4	2	2	3	1	4	2
51	2	3	2	2	4	4	3	2	3	4	3	2	3	3	2	2	3	3	3	4	3	3	3	3	4	3	3	3	3	4	4	1	1	4	2	1	1	4	2	3	3	2	4	2
52	4	2	2	2	2	2	2	4	3	2	3	3	2	2	3	4	2	4	4	4	3	3	2	3	2	4	6	6	6	6	6	2	1	4	1	2	1	4	2	3	3	2	4	2
53	1	3	2	2	4	3	4	1	1	1	3	1	2	1	3	2	3	3	3	2	2	3	1	2	3	3	4	2	2	2	2	1	1	3	1	2	1	3	2	3	4	2	4	2
54	3	3	1	2	2	3	5	4	3	3	2	3	3	2	3	3	4	4	4	4	3	4	3	2	3	3	6	6	7	6	6	1	1	4	1	2	4	4	2	1	4	2	4	2
55	3	3	5	5	3	4	2	2	1	1	3	1	1	1	2	3	3	1	5	1	1	1	1	1	1	5	1	3	1	4	1	1	1	4	1	2	2	4	2	1	4	1	4	2
56	4	4	3	2	3	2	4	4	4	4	5	3	4	4	3	4	4	4	4	4	3	4	4	4	4	3	5	5	5	4	3	1	1	1	3	1	1	1	2	1	5	1	4	2
57	4	3	3	2	3	4	4	4	4	4	5	3	4	4	3	4	4	4	4	4	3	4	3	2	2	3	2	5	5	4	3	1	1	1	2	1	1	1	2	1	1	2	4	2
58	3	2	3	2	3	3	4	4	4	3	3	4	4	4	3	3	3	3	3	4	3	4	4	4	3	3	2	2	2	2	2	2	1	2	2	1	1	2	2	3	2	2	4	2
59	3	2	3	2	4	3	4	4	4	3	4	4	4	4	3	3	3	3	4	3	3	4	4	4	3	3	2	2	5	4	2	2	1	2	3	1	2	2	2	3	4	1	4	2
60	3	2	2	3	1	1	4	1	4	2	3	2	5	1	3	3	3	3	3	3	2	4	2	2	1	3	3	3	2	2	1	1	1	4	2	1	1	4	1	2	1	2	3	2
61	4	5	3	2	4	2	3	3	2	3	4	3	4	3	3	2	5	3	2	3	4	3	4	3	3	3	6	7	7	5	4	2	1	3	1	1	1	3	1	3	2	1	2	2
62	4	4	3	2	3	3	3	3	3	3	3	3	2	3	2	2	2	2	3	2	2	2	2	2	3	3	4	3	3	4	4	1	1	3	1	1	1	3	1	2	4	1	2	2
63	3	2	2	3	1	1	4	1	4	2	3	2	5	1	3	4	3	3	3	3	3	4	4	3	1	3	3	3	2	2	1	1	1	4	1	2	1	4	1	1	1	2	3	1
64	3	2	3	4	3	3	4	2	2	3	3	1	2	4	3	4	4	3	2	2	3	2	3	4	4	2	3	4	2	3	3	1	2	1	1	2	1	1	1	3	4	1	4	2
65	3	3	3	1	3	4	2	3	2	4	4	1	5	2	3	4	4	3	4	3	3	2	3	4	4	2	3	3	2	2	4	1	2	1	3	2	2	1	1	3	3	1	1	2
66	4	2	3	1	2	3	3	2	2	3	3	3	2	4	2	3	4	3	3	3	2	2	3	4	4	2	2	2	2	2	2	1	2	1	3	2	1	1	1	3	1	1	2	2
67	3	4	3	3	3	2	2	3	3	2	3	3	2	2	3	2	3	3	3	3	3	2	3	4	4	3	4	5	4	6	2	1	3	2	1	2	1	2	1	2	1	1	3	2
68	3	4	3	2	4	4	4	4	4	2	3	2	3	2	3	4	4	4	4	3	3	2	4	4	3	4	4	4	5	4	4	1	1	3	1	1	1	3	1	4	4	1	2	2
69	3	2	2	3	1	1	3	1	3	2	3	3	5	1	3	3	3	3	3	3	2	4	4	2	1	3	3	3	2	2	1	1	1	4	2	1	1	4	1	1	3	1	2	2
70	3	3	3	2	2	4	4	3	4	2	3	3	3	2	1	3	3	2	4	4	3	3	4	4	4	3	3	3	3	4	3	1	1	1	3	2	1	1	1	3	4	1	2	2
71	4	4	4	3	2	2	3	1	3	3	3	1	5	3	3	3	4	3	4	3	3	3	4	3	3	3	4	3	3	4	2	1	2	1	2	1	1	1	1	3	2	1	2	2
72	5	4	4	3	3	4	2	2	4	2	3	1	2	2	2	4	2	4	4	3	3	3	3	3	3	3	6	5	5	4	6	1	1	3	1	2	1	3	1	1	2	2	2	2
73	5	4	3	4	2	4	3	2	4	2	3	1	2	2	2	3	2	4	4	3	3	3	3	3	3	3	6	6	6	4	6	1	1	4	1	2	1	4	2	3	5	1	4	2
74	4	2	3	3	3	4	4	2	4	2	4	2	3	4	3	4	2	3	2	4	3	4	4	4	3	2	3	3	3	6	6	2	2	1	1	1	1	1	1	1	3	1	1	1
75	2	3	2	2	4	4	3	4	3	4	3	2	3	3	2	2	3	3	3	4	4	3	4	3	4	3	3	3	3	4	4	2	1	3	1	2	1	3	2	1	4	1	2	2
76	4	4	3	2	2	3	3	3	2	3	4	3	4	3	2	4	3	4	4	4	2	4	3	4	3	3	6	6	5	4	4	1	1	4	2	2	1	4	1	4	2	2	2	2
77	4	5	3	2	4	2	3	3	2	3	4	3	4	3	3	2	4	3	4	3	2	3	3	4	3	3	6	6	5	4	4	1	1	3	1	1	1	3	1	3	4	1	4	2
78	2	3	4	2	5	3	3	4	3	2	2	1	3	1	1	1	2	1	3	5	3	5	3	4	3	2	1	1	2	2	7	1	1	4	2	1	1	4	1	3	1	2	2	2
79	3	3	3	2	3	4	4	3	4	2	3	3	3	2	4	3	3	2	4	4	3	2	4	4	4	3	4	5	5	5	3	1	1	2	1	1	3	2	2	1	4	1	2	2
80	3	2	3	2	4	3	4	3	4	2	3	2	3	2	3	4	4	4	3	3	3	4	2	4	3	4	4	4	5	4	5	1	4	2	2	2	1	2	1	3	1	1	4	2
81	3	3	4	3	3	4	4	4	4	2	3	2	3	2	3	4	3	3	3	2	3	2	4	4	3	4	4	4	4	3	4	1	2	3	1	2	1	2	1	2	1	1	3	2
82	4	4	3	3	2	3	2	3	2	3	3	3	2	3	2	4	3	4	5	5	3	4	3	4	3	4	6	6	5	4	4	2	1	4	2	1	1	4	1	3	2	2	4	2
83	2	3	2	2	2	4	4	1	2	1	4	3	3	1	3	2	3	3	3	4	2	3	1	3	3	3	4	2	2	2	4	1	1	4	1	2	2	4	1	2	2	2	3	2
84	1	3	2	2	3	3	3	2	1	2	3	1	4	3	2	3	3	3	4	2	3	1	2	3	3	3	4	2	3	3	2	1	1	4	2	1	2	4	1	3	1	2	3	2
85	1	3	3	2	4	3	4	3	3	3	3	1	2	2	3	2	3	3	5	4	2	3	1	2	3	3	4	2	3	2	4	1	1	4	1	2	1	4	1	3	4	1	2	2
86	2	3	4	2	5	5	3	3	3	4	2	1	2	1	2	1	2	3	3	4	3	4	2	3	3	4	1	1	2	2	7	1	1	3	1	2	1	3	2	3	2	2	4	2
87	4	4	4	4	2	3	2	2	4	3	3	1	2	2	2	4	2	4	4	3	3	3	3	3	3	3	6	6	6	4	6	1	1	4	1	2	4	4	2	1	2	2	4	2
88	1	3	5	5	4	3	2	3	3	3	4	2	1	1	1	1	1	1	1	2	1	1	1	1	1	5	1	3	3	1	1	1	1	4	1	2	2	4	2	1	4	1	4	2
89	3	4	4	3	3	3	4	4	4	4	5	3	4	4	3	3	4	4	4	4	3	4	4	4	4	3	5	5	5	4	3	1	1	1	3	1	1	1	1	1	5	1	4	2
90	4	3	3	2	3	4	4	4	4	4	5	3	4	3	3	4	4	3	3	4	3	4	4	4	4	3	5	5	5	4	3	1	1	1	2	1	1	1	1	1	1	2	4	1
91	3	4	3	3	4	3	4	4	3	2	3	2	3	2	3	4	4	4	4	3	3	4	4	4	3	4	3	4	4	3	4	1	1	3	1	1	1	3	1	4	4	1	2	2
92	3	2	2	3	1	3	3	1	3	2	3	3	5	1	3	3	3	3	3	3	2	2	4	3	2	3	3	3	2	2	1	1	1	4	2	1	1	4	1	1	3	1	2	2
93	3	3	3	2	2	4	4	3	4	2	3	3	3	2	1	3	3	2	4	4	3	4	4	4	4	3	3	3	3	4	3	1	1	1	3	2	1	1	1	3	4	1	2	2
94	5	4	4	3	2	2	3	1	3	3	3	1	5	3	3	3	4	3	4	3	3	3	4	3	3	3	4	3	3	4	2	1	2	1	2	1	1	1	1	3	5	1	2	2
95	3	4	4	3	3	4	2	2	4	2	3	1	2	2	2	4	2	4	4	3	3	3	3	3	3	3	6	5	5	4	6	1	1	3	1	2	1	3	1	1	2	2	2	2
96	5	4	3	4	2	4	3	2	3	2	3	1	2	2	2	3	2	4	3	4	4	3	3	4	3	3	6	6	6	4	6	1	1	4	1	2	1	4	2	3	5	1	4	2
97	2	2	3	2	4	4	5	3	3	3	2	1	3	2	1	1	2	2	3	3	3	4	3	3	4	4	1	1	2	3	7	1	1	4	2	1	1	3	1	1	4	1	4	2
98	4	3	2	2	4	4	4	3	4	2	3	2	4	4	2	3	3	4	4	4	4	3	4	4	4	3	2	2	2	2	2	1	1	4	2	1	1	4	1	3	1	2	3	2
99	4	3	2	2	4	4	3	3	4	2	3	2	4	4	2	3	3	4	4	4	3	4	4	4	4	3	2	2	2	2	2	1	1	4	1	1	1	4	1	2	1	2	1	2
100	3	4	2	3	3	3	3	3	4	2	2	1	2	2	1	2	2	2	3	4	2	4	3	2	2	2	2	3	2	2	4	2	1	3	1	2	1	3	1	1	4	1	4	2
101	2	3	4	2	3	2	3	4	3	2	3	1	3	1	1	1	2	1	3	4	3	4	3	3	1	4	1	2	3	3	7	1	1	3	1	2	2	2	1	3	2	2	4	2
102	5	4	4	4	2	4	2	2	4	2	3	1	2	2	2	3	2	4	3	3	3	1	3	3	3	3	6	6	6	4	6	1	1	3	2	1	1	3	1	2	1	2	3	2
103	4	3	2	2	4	4	3	3	4	2	3	2	4	4	2	3	3	2	4	4	3	4	4	4	4	3	2	2	2	2	2	2	1	4	1	2	1	4	1	2	4	1	3	2
104	2	3	4	2	4	1	5	4	3	1	4	1	1	1	2	1	3	3	2	3	3	5	3	5	3	1	4	3	5	2	6	1	4	5	2	2	1	4	1	2	4	1	1	2
105	4	4	1	3	5	5	4	4	3	1	5	2	3	4	1	3	3	4	4	4	4	4	4	3	4	5	6	6	6	3	6	1	1	4	1	1	1	4	1	2	4	1	3	2
106	2	1	4	2	3	2	4	2	3	1	3	1	5	3	1	1	1	1	1	4	3	4	2	3	3	2	1	1	1	1	1	1	1	4	1	2	1	1	1	1	2	2	3	1
107	4	4	5	3	2	2	3	1	3	3	3	1	5	4	3	3	4	3	3	5	3	4	4	3	4	5	4	3	3	4	1	1	1	4	2	2	1	4	1	3	5	1	3	2
108	2	3	2	2	4	4	3	4	3	4	3	2	3	3	2	3	3	3	3	4	4	3	4	3	4	3	3	3	3	4	4	1	3	4	1	2	2	3	1	2	4	1	2	2
109	4	2	2	2	2	2	2	4	4	2	3	3	2	2	1	4	2	4	4	2	4	4	4	4	4	4	6	6	6	6	6	1	1	4	1	1	1	4	1	2	5	1	4	2
110	1	3	2	2	4	3	4	1	1	1	3	1	2	1	3	2	3	3	5	4	2	3	1	2	3	3	4	2	2	2	2	1	1	4	1	2	1	4	1	2	4	1	3	2
111	3	3	3	2	2	4	4	3	4	2	3	3	3	2	4	3	3	2	4	3	3	4	4	4	4	3	3	3	3	4	2	1	1	2	3	1	1	2	1	4	2	2	3	2
112	4	4	4	3	4	3	3	2	3	4	3	3	3	3	3	4	5	5	4	4	4	4	3	3	4	3	4	4	4	4	7	2	1	4	1	1	2	4	2	2	5	1	4	2
113	2	1	4	2	3	2	4	2	3	3	3	4	3	3	1	3	1	3	1	4	3	4	2	3	3	2	1	5	3	4	3	1	1	4	2	1	1	4	2	3	1	2	4	2
114	2	1	4	2	3	2	4	2	3	1	3	1	2	3	3	1	1	1	1	4	3	3	2	3	3	2	1	4	5	4	3	2	1	4	3	1	1	4	2	3	3	1	4	2
115	4	4	4	3	3	3	3	3	3	4	3	3	3	3	3	3	2	3	4	4	4	4	3	3	4	3	4	4	4	4	7	2	1	3	2	1	1	3	2	2	1	2	4	2
116	3	2	2	3	1	2	2	3	1	1	2	1	1	1	1	3	2	2	3	3	3	3	3	3	3	2	3	2	4	2	2	1	1	4	1	2	1	4	2	3	2	2	4	2
117	4	3	2	2	4	4	3	3	4	2	3	2	4	4	3	3	3	4	4	3	3	4	2	4	4	3	2	2	2	2	2	2	1	4	1	2	1	4	2	2	3	1	4	2
118	2	1	2	2	5	3	5	3	3	3	3	3	2	2	1	3	3	4	4	3	3	3	3	3	2	3	5	5	4	5	4	1	1	4	2	1	1	4	2	3	2	2	4	2
119	3	3	3	2	2	3	4	3	4	2	3	3	3	2	1	3	3	2	4	4	3	4	4	4	4	3	3	3	3	4	3	2	1	4	1	2	1	4	2	3	2	2	4	2
120	3	3	3	2	4	4	4	2	3	2	3	2	3	2	3	2	4	4	4	3	3	4	4	4	3	3	4	4	5	4	4	1	1	3	1	2	1	3	2	3	2	2	4	2
121	3	1	3	2	2	2	4	4	3	2	3	2	3	2	3	4	1	4	4	3	3	2	4	4	3	4	4	4	5	4	4	1	1	4	1	2	4	4	2	1	2	2	4	2
122	4	3	2	2	4	4	3	3	2	3	4	2	4	4	3	2	3	3	4	4	3	4	4	3	4	3	2	2	2	2	2	2	1	1	1	2	1	4	2	2	3	1	4	2
123	2	1	2	2	2	5	5	3	3	3	3	3	2	2	3	3	3	4	3	3	2	3	3	3	2	3	5	5	4	5	4	1	1	2	2	1	2	4	2	3	4	2	4	2
124	3	3	3	2	2	4	4	3	4	3	4	3	3	3	1	3	3	3	4	5	3	4	4	4	4	4	5	3	3	5	5	2	1	2	2	2	2	4	2	3	3	2	4	2
125	3	3	3	2	4	2	4	2	3	4	4	4	4	2	4	4	4	4	4	3	3	4	3	4	3	3	4	4	5	4	4	1	1	2	1	2	1	3	2	3	4	2	4	2
126	3	4	3	2	4	4	4	2	4	4	3	2	3	3	3	4	4	4	4	3	3	4	4	4	3	4	4	4	5	4	4	1	1	1	3	2	2	4	2	1	4	2	4	2
127	3	4	3	2	4	3	3	4	3	4	3	3	3	3	3	3	4	3	3	4	3	3	4	2	2	2	3	3	4	4	3	2	1	3	1	1	1	3	1	2	2	2	2	2
128	4	3	4	3	4	3	3	3	4	3	3	4	3	3	4	3	3	4	2	3	4	3	3	2	3	2	4	3	3	2	4	2	1	3	1	1	1	3	1	1	4	1	2	1
129	4	2	2	2	3	2	4	3	3	2	4	3	3	4	3	2	3	2	3	2	2	3	3	4	4	3	3	4	3	3	4	1	1	3	1	2	1	4	2	2	2	2	4	2
130	3	2	3	3	4	3	3	4	3	3	3	3	3	3	3	4	3	3	1	3	4	4	3	2	3	3	3	4	3	3	3	1	2	1	1	1	1	1	1	1	4	1	4	1
131	3	3	3	2	4	2	4	4	3	2	4	4	3	3	3	2	3	3	3	3	3	3	4	3	2	3	2	4	3	3	3	1	1	4	1	2	1	4	2	2	2	2	4	2
132	4	3	3	4	4	3	3	3	2	3	3	2	3	4	4	3	3	4	3	4	3	3	4	3	2	3	2	4	3	3	3	1	1	2	1	1	1	2	1	3	1	1	2	2
133	4	2	3	3	3	3	4	3	3	3	4	3	3	3	3	3	4	4	2	3	4	4	4	3	3	4	3	3	2	2	3	1	1	3	1	1	1	3	1	1	1	1	4	1
134	3	3	3	3	4	2	3	3	4	3	4	3	3	2	4	3	3	2	2	4	3	4	3	3	2	3	3	5	3	3	4	2	1	4	2	1	1	4	1	1	1	1	2	1
135	4	3	4	3	3	3	3	3	3	3	3	2	2	3	4	3	2	3	3	3	3	4	4	3	5	3	4	3	4	3	4	1	2	1	1	1	1	1	1	3	1	1	4	2
136	4	4	3	2	4	3	3	4	4	2	4	3	3	3	3	2	3	3	3	3	2	2	3	3	2	3	3	2	3	3	3	1	1	2	1	2	1	2	1	3	5	1	2	2
137	4	3	3	2	3	3	4	4	4	3	3	4	3	2	4	3	3	2	2	4	3	3	5	3	3	3	4	2	3	3	3	1	1	3	2	1	1	3	1	1	2	2	2	1
138	4	2	3	3	3	2	3	3	4	4	4	3	3	3	4	2	3	4	1	2	3	4	3	2	3	3	4	3	2	3	3	1	3	2	1	2	1	2	1	3	5	1	2	2
139	3	3	3	4	4	3	3	4	4	3	4	2	3	3	3	2	3	3	4	3	3	3	4	3	3	4	2	4	2	3	3	1	1	4	1	1	1	4	1	3	1	2	3	2
140	3	2	2	3	3	2	3	4	3	2	3	2	2	2	3	3	2	3	3	2	3	2	3	2	3	4	3	3	2	3	2	1	1	4	1	2	1	4	2	3	5	1	4	2
141	3	2	3	2	4	3	3	4	3	2	4	3	3	4	3	2	3	3	4	3	2	3	4	3	2	3	3	4	3	3	3	1	1	4	1	2	1	4	2	2	2	2	4	2
142	4	2	2	2	3	3	4	3	3	4	4	3	3	4	3	2	3	2	3	3	2	3	3	2	4	3	3	4	3	3	4	1	1	3	1	2	1	4	2	2	4	2	4	2
143	3	3	2	3	3	3	3	4	3	3	3	2	2	2	3	3	2	3	3	2	3	2	3	2	3	4	3	3	2	3	2	1	1	4	1	2	1	4	2	3	5	1	4	2
144	3	2	3	2	4	3	4	4	3	2	4	4	3	3	3	2	3	3	3	3	4	3	4	3	2	3	3	4	3	3	3	2	1	4	1	2	1	4	2	2	4	2	4	2
145	4	2	2	2	3	3	4	3	3	4	4	3	3	4	3	2	3	2	3	3	2	3	3	4	3	3	3	4	3	3	4	1	1	3	1	2	1	4	2	2	4	2	4	2
146	3	2	2	3	3	4	3	4	3	4	3	2	2	2	3	3	2	3	3	2	3	2	3	2	3	4	2	3	2	3	2	1	1	4	1	2	1	4	2	3	5	1	4	2
147	3	2	3	2	4	3	4	4	3	2	4	4	3	3	3	2	3	3	3	3	3	3	4	3	2	3	2	4	3	3	3	1	1	4	1	2	1	4	2	2	4	2	4	2
148	4	2	2	2	3	3	4	3	3	4	4	3	3	4	3	3	3	2	3	3	2	2	3	4	4	3	2	4	3	2	4	1	1	3	1	2	1	4	2	2	4	2	4	2
149	3	2	2	3	3	4	3	4	3	3	3	2	2	2	3	3	2	3	3	2	3	2	3	2	3	4	2	3	2	2	2	1	1	4	1	2	1	4	2	3	5	1	4	2
150	3	1	3	2	4	3	4	4	3	3	4	4	3	3	3	2	3	3	3	3	3	3	4	3	2	3	3	4	3	2	3	1	1	4	1	2	1	4	2	2	4	2	4	2
151	4	2	2	2	3	3	4	3	3	4	4	3	3	4	3	2	3	2	3	3	2	3	3	2	4	3	3	4	3	2	4	1	1	3	1	2	1	4	2	2	4	2	4	2
152	3	2	2	3	3	4	3	4	3	2	3	2	2	2	3	3	2	3	3	2	3	2	3	2	3	4	3	3	2	2	2	1	1	4	1	2	1	4	2	3	4	1	4	2
153	3	2	3	2	4	3	4	4	3	2	4	4	3	3	3	2	3	3	3	3	3	3	4	3	2	3	3	4	3	2	3	1	1	4	1	2	1	4	2	2	4	2	4	2
154	4	2	2	2	3	3	4	3	3	4	4	3	3	4	3	2	3	2	3	3	2	3	3	4	4	3	3	4	3	2	4	1	1	3	1	2	1	4	2	2	4	2	4	2
155	3	2	2	3	3	4	3	4	3	2	3	2	2	2	3	3	2	3	3	2	3	2	3	2	3	4	3	3	2	3	2	1	1	4	1	2	1	4	2	3	4	1	4	2
156	4	2	3	2	4	3	4	4	3	3	4	4	3	3	3	2	3	3	3	2	3	3	4	3	2	3	3	4	3	3	3	1	1	4	2	2	1	4	2	2	4	2	4	2
157	4	2	2	2	3	3	4	3	3	4	4	3	3	4	3	2	3	2	3	3	2	3	3	4	4	3	3	4	3	3	4	1	1	3	1	2	1	4	2	2	4	2	4	2
158	3	3	2	3	3	4	3	4	3	2	3	2	2	2	3	3	2	3	3	3	3	2	3	2	3	4	2	3	2	3	2	2	1	4	1	2	1	4	2	3	4	1	4	2
159	3	2	3	2	4	3	4	4	3	2	4	4	3	3	3	4	3	3	3	3	3	2	4	3	2	3	2	4	3	3	3	1	1	4	1	2	1	4	2	2	4	2	4	2
160	4	2	2	2	3	3	4	3	3	4	4	3	3	4	3	2	3	2	3	2	2	3	3	4	4	3	2	4	3	3	4	1	1	3	1	2	1	4	2	2	4	2	4	2
161	3	2	2	3	3	4	3	4	3	2	3	2	2	2	3	3	2	3	3	2	3	2	3	2	3	4	3	3	2	3	2	1	1	4	1	2	1	4	2	3	3	1	4	2
162	3	1	3	2	4	3	4	4	3	2	4	4	3	3	3	2	3	3	3	3	3	3	4	3	2	3	3	4	3	3	3	1	1	4	1	2	1	4	2	2	4	2	4	2
163	4	2	2	2	3	3	4	3	3	4	4	3	3	4	3	2	3	2	3	3	2	3	3	4	3	3	3	4	3	3	4	1	1	3	1	2	1	4	2	2	4	2	4	2
164	3	2	3	3	3	4	3	4	3	2	3	2	2	2	3	3	2	3	3	3	3	2	3	2	3	4	3	3	2	3	2	1	1	4	1	2	1	4	2	3	3	1	4	2
165	3	4	3	2	2	4	4	4	4	4	3	2	3	3	3	4	4	4	4	3	3	4	3	4	3	4	4	4	5	4	4	1	1	1	3	2	2	4	2	1	4	2	4	2
166	3	4	3	3	4	3	3	4	3	4	3	3	3	3	3	3	2	3	3	4	3	3	4	4	2	2	3	3	4	4	3	2	1	3	1	1	1	3	1	2	2	2	2	2
167	4	3	4	3	4	3	3	3	4	3	3	4	3	3	4	3	3	4	2	3	4	3	3	2	3	4	4	3	3	2	4	2	1	3	1	1	1	3	1	1	4	1	2	1
168	4	2	2	2	3	3	4	3	3	4	4	3	3	4	3	2	3	2	3	3	3	1	3	4	4	3	3	4	3	3	4	1	1	1	1	2	1	4	2	2	4	2	4	2
169	4	2	3	3	3	4	4	3	3	3	4	3	3	3	4	3	4	4	2	3	4	4	4	3	3	4	3	3	4	2	3	1	1	3	1	1	1	3	1	1	1	1	4	1
170	3	3	3	3	4	2	3	3	4	3	4	3	3	2	4	3	3	4	2	4	3	4	3	3	2	3	3	5	3	3	4	2	1	4	2	1	1	4	1	1	1	1	2	1
171	4	3	4	3	3	4	3	3	3	3	3	2	2	3	4	3	2	3	3	3	3	4	4	4	5	3	4	3	4	3	4	1	2	1	1	1	1	1	1	3	1	1	4	2
172	3	4	3	2	4	3	3	4	3	2	4	3	3	3	3	2	3	3	3	3	3	3	3	3	4	4	3	2	3	3	3	1	1	2	1	2	1	2	1	3	5	1	2	2
173	4	3	3	2	3	3	4	4	4	3	3	4	3	2	4	3	3	3	2	4	3	4	3	3	3	3	4	2	3	3	3	1	1	3	2	1	1	3	1	1	2	2	2	1
174	4	2	3	3	3	4	3	3	4	4	4	3	3	3	4	2	3	4	1	3	3	4	3	2	3	3	4	3	2	3	3	1	3	2	1	2	1	2	1	3	1	1	2	2
175	3	3	3	4	4	3	3	4	4	3	4	2	3	3	3	2	3	3	4	3	3	3	4	3	3	4	2	4	4	3	3	1	1	1	1	1	1	4	1	3	1	2	3	2
176	2	1	4	2	3	2	4	2	3	1	3	1	5	3	1	3	2	1	1	4	3	3	2	3	3	2	1	4	1	1	3	1	1	4	1	2	1	1	1	1	2	2	3	1
177	4	4	5	3	2	2	3	1	3	3	3	1	5	4	3	3	4	3	3	3	3	3	4	3	4	5	4	3	3	4	3	1	1	2	2	2	1	4	1	3	5	1	3	2
178	2	3	2	2	4	4	3	4	3	2	4	2	3	3	2	3	3	3	4	4	2	3	4	3	4	4	3	3	3	4	4	1	3	4	1	2	2	3	1	2	2	1	2	2
179	4	2	2	2	2	2	2	4	4	2	3	3	2	2	3	4	2	4	4	2	4	4	3	3	4	3	6	6	6	6	6	1	1	3	1	1	1	4	1	2	1	1	4	2
180	3	3	2	3	4	3	4	1	1	1	3	1	2	1	3	2	3	3	5	3	2	3	1	3	3	3	4	5	3	5	2	1	1	4	1	2	1	4	1	2	1	1	3	2
181	3	3	3	2	2	4	4	3	4	2	3	3	3	2	1	3	3	2	4	4	3	4	4	4	4	3	3	3	3	4	2	1	1	2	3	1	1	2	1	4	1	2	3	2
182	4	4	4	3	3	3	3	4	3	4	3	3	3	3	3	4	3	3	4	3	4	4	3	3	4	3	4	4	4	4	7	2	1	4	1	1	2	4	1	2	1	1	4	2
183	3	2	4	2	3	2	4	2	3	1	3	4	5	3	3	3	1	3	1	4	3	4	2	3	3	5	1	5	3	4	3	1	1	2	2	1	1	4	2	3	1	2	4	2
184	4	4	3	4	3	4	4	4	3	4	2	3	4	4	3	3	2	3	4	3	3	4	3	3	4	3	5	5	5	4	3	1	1	1	3	1	1	1	1	1	1	1	4	2
185	4	4	3	2	3	4	4	4	4	4	3	3	4	4	3	4	3	4	4	4	3	3	3	4	4	3	5	5	5	4	3	1	1	1	2	1	1	1	1	1	4	2	4	1
186	3	2	3	2	3	4	4	4	2	3	3	4	4	4	3	3	3	3	3	3	4	4	4	3	3	3	4	2	2	2	2	2	1	2	2	1	1	2	1	3	1	2	4	2
187	3	2	3	2	4	3	4	4	3	3	5	4	4	4	2	3	3	3	4	4	3	4	4	3	3	4	2	2	5	4	2	2	1	2	3	1	2	2	2	3	4	1	4	2
188	4	2	2	3	3	4	4	1	4	2	3	2	5	1	3	2	3	3	3	3	2	2	3	2	4	3	3	3	2	2	1	1	1	4	2	1	1	4	1	2	1	2	3	2
189	4	5	3	2	4	2	3	3	2	3	4	3	4	3	3	2	3	3	4	3	4	3	5	3	3	3	6	7	7	5	4	2	1	3	1	1	1	3	1	3	1	1	2	2

## Sheet: participants test
	1-How would you rate your quality of life?	2-How satisfied are you with your health?	3-To what extent do you feel that physical pain prevents you from doing what you need to do?	4-How much do you need any medical treatment to function in your daily life?	5-How much do you enjoy life?	6-To what extent do you feel your life to be meaningful?	7-How well are you able to concentrate?	8-How safe do you feel in your daily life?	9-How healthy is your physical environment?	10-Do you have enough energy for everyday life?	11-Are you able to accept your bodily appearance?	12-Have you enough money to meet your needs?	13-How available to you is the information you need in your daily life?	14-To what extent do you have the opportunity for leisure activities?	15How well are you able to get around physically?	16-How satisfied are you with your sleep?	17-How satisfied are you with your ability to perform your daily living activities?	18-How satisfied are you with your capacity for work	19-How satisfied are you with yourself?	20-How satisfied are you with your personal relationships?	21-How satisfied are you with your sex life?	22-How satisfied are you with the support you get from your friends?	23-How satisfied are you with the conditions of your living place?	24-How satisfied are you with your access to health services?	25-How satisfied are you with your transport?	26-How often do you have negative feelings such as blue mood, despair, anxiety or depression?	27-In most ways, my life is close to my ideal.	28-The conditions of my life are excellent.	29-I am satisfied with my life	30-So far, I have gotten the important things I want in life.	31-If I could live my life over, I would change almost nothing.	32-What is your gender?	33-Are you married?	34-How old are you?	35-Level of education?	36-Are you an employee?	37-What is duration since the injury?	38-What is the age of injury?	39-What type of damage?	40-Neurological severity of injury (AIS)	41-What is the level of injury?	42-what is your paralysis type?	43-What was the cause of your injury?	44-What is the state of your injury?
1	1	3	2	2	4	3	4	1	1	1	3	1	2	1	3	2	3	3	5	4	2	3	1	2	3	3	4	2	2	2	2	1	1	3	1	1	1	3	1	1	2	2	4	2
2	4	2	4	2	4	5	5	2	2	2	2	1	2	2	2	4	2	3	2	4	3	4	4	3	3	3	4	4	2	2	6	1	1	4	2	1	1	4	1	1	3	1	4	1
3	3	4	5	1	5	5	5	5	5	5	5	3	3	3	5	5	4	4	5	4	4	5	4	4	4	3	6	6	6	4	1	1	1	3	1	1	2	3	1	4	5	1	4	2
4	4	5	3	2	4	2	3	3	2	3	4	3	4	3	3	2	4	3	4	4	2	4	3	4	3	3	6	6	5	4	4	2	1	3	1	2	1	3	1	1	2	2	2	1
5	2	3	4	2	5	4	5	3	3	2	2	1	3	1	1	1	2	1	3	5	3	5	5	5	5	4	1	1	2	3	7	1	1	4	2	1	1	4	1	1	4	1	4	2
6	4	3	2	2	4	4	4	3	4	2	3	2	4	4	2	3	3	4	4	4	4	3	4	4	4	3	2	2	2	2	2	1	1	4	2	1	1	4	1	3	1	2	3	2
7	4	3	2	2	4	4	3	3	4	2	3	2	4	4	2	3	3	4	4	4	3	4	4	4	4	3	2	2	2	2	2	1	1	4	1	1	1	4	1	2	1	2	1	2
8	3	4	2	3	3	3	3	3	4	2	2	1	2	2	1	2	2	2	3	2	2	1	3	2	2	4	2	3	2	2	4	2	1	3	1	2	1	3	1	1	4	1	4	2
9	2	3	4	2	5	5	3	4	3	2	2	1	3	1	1	1	2	1	3	5	3	5	5	5	5	4	1	1	2	3	7	1	1	3	1	2	2	2	1	3	2	2	4	2
10	4	2	3	2	2	4	2	2	4	2	4	1	3	4	3	5	2	2	2	4	3	4	4	4	1	2	3	2	2	6	6	2	2	1	1	1	1	1	1	1	3	1	1	1
11	2	1	1	2	4	5	5	3	2	1	5	3	4	1	1	2	1	1	3	4	4	5	4	4	4	3	2	2	2	6	4	1	1	4	1	1	1	4	1	3	2	1	4	2
12	3	3	4	2	4	5	5	4	4	3	4	3	4	2	2	4	3	3	4	3	3	4	4	5	4	3	5	5	5	5	4	1	2	1	3	2	2	1	1	3	3	1	4	2
13	5	4	4	4	2	4	2	2	4	2	3	1	2	2	2	4	2	4	4	3	3	3	3	3	3	3	6	6	6	4	6	1	1	4	1	2	1	4	1	3	2	1	4	2
14	1	3	2	2	4	3	4	1	1	1	3	1	2	1	2	3	3	5	4	2	3	1	2	3	3	3	4	2	2	2	2	1	1	4	2	1	1	4	1	3	1	2	3	2
15	5	4	4	4	2	4	2	2	4	2	3	1	2	2	2	4	2	4	3	3	3	3	3	3	3	3	6	6	6	4	6	1	1	3	2	1	1	3	1	2	1	2	3	2
16	4	4	5	3	2	2	3	1	3	3	3	1	5	4	5	3	4	3	3	5	3	5	4	3	4	5	4	3	3	4	1	1	1	4	2	2	1	4	1	3	5	1	3	2
17	4	2	1	2	4	5	5	4	4	3	4	3	4	2	2	4	3	3	4	3	3	4	5	4	4	3	5	5	5	5	4	1	2	1	1	2	1	1	1	1	4	1	3	1
18	3	4	4	2	3	3	3	3	4	2	3	4	3	3	3	4	3	2	3	4	2	4	4	4	3	4	5	5	4	4	3	1	1	2	2	1	1	2	1	3	4	1	2	2
19	2	3	4	2	5	4	5	3	3	2	2	1	3	1	1	1	2	1	3	5	3	5	5	5	5	4	1	1	2	3	7	1	1	4	2	1	1	4	1	1	4	1	4	2
20	1	3	5	5	3	2	2	1	1	1	1	1	1	1	1	1	1	1	1	1	1	1	1	1	1	5	1	1	1	1	1	1	1	4	1	2	2	4	2	1	4	1	4	2
21	2	1	1	2	4	5	5	3	2	1	5	3	4	1	1	2	1	1	3	4	4	5	4	4	4	3	2	2	2	6	4	1	1	4	1	1	1	4	1	3	2	2	4	2
22	4	5	3	2	4	2	3	3	2	3	4	3	4	3	3	2	4	3	4	4	2	4	3	4	3	3	6	6	5	4	4	2	1	3	1	2	1	3	1	1	2	2	2	1
23	4	2	4	2	4	5	5	2	2	2	2	1	2	2	2	4	2	3	2	4	3	4	4	3	3	3	4	4	2	2	6	1	1	4	2	1	1	4	1	1	3	1	4	1
24	1	3	2	2	4	3	4	1	1	1	3	1	2	1	3	2	3	3	5	4	2	3	1	2	3	3	4	2	2	2	2	1	1	4	1	2	1	4	1	2	2	2	3	2
25	4	5	3	2	4	2	3	3	2	3	4	3	4	3	3	2	4	3	4	4	2	4	3	4	3	3	6	6	5	4	4	2	1	3	1	1	1	3	1	1	4	1	1	2
26	4	5	3	2	4	2	3	3	2	3	4	3	4	3	3	2	4	3	4	4	2	4	3	4	3	3	6	6	5	4	4	2	1	3	1	2	1	3	1	1	2	2	2	1
27	1	1	2	2	1	1	1	1	2	1	3	1	3	1	1	2	2	2	2	5	5	5	5	5	5	4	1	1	2	3	7	1	1	4	1	2	1	4	1	1	1	2	3	1
28	4	5	3	2	2	3	3	3	2	3	4	3	4	3	3	2	4	3	4	4	2	4	3	4	3	3	6	6	5	4	4	2	1	4	2	1	1	4	1	1	3	1	4	2
29	2	3	4	2	5	4	5	3	3	2	2	1	3	1	1	1	2	1	3	5	3	5	5	5	5	4	1	1	2	3	7	1	1	4	2	1	1	4	1	1	4	1	4	2
30	4	3	2	2	4	4	4	3	4	2	3	2	4	4	2	3	3	4	4	4	4	3	4	4	4	3	2	2	2	2	2	1	1	4	2	1	1	4	1	3	1	2	3	2

## Sheet: re test
	1-How would you rate your quality of life?	2-How satisfied are you with your health?	3-To what extent do you feel that physical pain prevents you from doing what you need to do?	4-How much do you need any medical treatment to function in your daily life?	5-How much do you enjoy life?	6-To what extent do you feel your life to be meaningful?	7-How well are you able to concentrate?	8-How safe do you feel in your daily life?	9-How healthy is your physical environment?	10-Do you have enough energy for everyday life?	11-Are you able to accept your bodily appearance?	12-Have you enough money to meet your needs?	13-How available to you is the information you need in your daily life?	14-To what extent do you have the opportunity for leisure activities?	15How well are you able to get around physically?	16-How satisfied are you with your sleep?	17-How satisfied are you with your ability to perform your daily living activities?	18-How satisfied are you with your capacity for work	19-How satisfied are you with yourself?	20-How satisfied are you with your personal relationships?	21-How satisfied are you with your sex life?	22-How satisfied are you with the support you get from your friends?	23-How satisfied are you with the conditions of your living place?	24-How satisfied are you with your access to health services?	25-How satisfied are you with your transport?	26-How often do you have negative feelings such as blue mood, despair, anxiety or depression?	27-In most ways, my life is close to my ideal.	28-The conditions of my life are excellent.	29-I am satisfied with my life	30-So far, I have gotten the important things I want in life.	31-If I could live my life over, I would change almost nothing.	32-What is your gender?	33-Are you married?	34-How old are you?	35-Level of education?	36-Are you an employee?	37-What is duration since the injury?	38-What is the age of injury?	39-What type of damage?	40-Neurological severity of injury (AIS)	41-What is the level of injury?	42-what is your paralysis type?	43-What was the cause of your injury?	44-What is the state of your injury?
1	3	2	2	4	3	4	1	1	1	3	1	2	1	3	2	3	3	5	4	2	3	1	2	3	3	4	2	3	3	2	4	2	1	3	1	2	1	3	1	1	2	2	2	1
2	4	2	4	2	4	5	5	2	2	2	2	1	2	2	2	4	2	3	3	4	3	4	4	3	3	3	4	4	2	2	6	1	1	3	1	1	1	3	1	1	2	2	4	2
3	3	4	5	1	5	5	5	5	5	5	5	3	3	3	5	5	4	4	5	4	4	5	4	4	4	3	6	5	6	4	1	1	2	1	3	2	2	1	1	3	3	1	4	2
4	4	5	3	2	4	2	3	3	2	3	4	3	4	3	3	2	4	3	4	4	2	4	3	3	3	3	6	6	6	4	4	1	1	4	1	1	1	4	1	3	2	2	4	2
5	2	3	4	2	5	4	5	3	3	2	2	1	3	1	1	1	2	1	3	5	3	5	5	5	5	4	1	2	2	3	7	1	1	3	1	1	2	3	1	4	5	1	4	2
6	4	3	2	2	4	4	4	3	4	2	3	2	4	4	2	3	3	4	4	4	4	3	4	4	4	3	2	2	2	2	2	1	1	4	2	1	1	4	1	1	3	1	4	1
7	4	3	2	2	4	4	3	3	4	2	3	2	4	4	2	3	3	4	4	4	3	4	4	4	4	3	2	1	2	2	2	1	1	3	1	2	2	2	1	3	2	2	4	2
8	3	4	2	3	3	3	3	3	4	2	2	1	2	2	1	2	2	2	3	2	2	1	3	3	2	4	2	3	2	2	4	2	1	3	1	2	1	3	1	1	4	1	4	2
9	2	3	4	2	5	5	3	4	3	2	2	1	3	1	1	1	3	1	3	5	3	5	5	5	5	4	1	1	3	3	7	1	1	4	1	1	1	4	1	2	1	2	1	2
10	4	2	3	2	2	4	2	2	4	2	4	1	3	4	3	5	2	2	3	4	3	4	4	4	1	2	3	2	2	6	6	1	1	4	2	1	1	4	1	3	1	2	3	2
11	3	1	3	1	2	1	2	2	2	1	3	1	2	2	2	3	4	2	2	3	2	3	4	4	2	2	2	2	3	2	2	2	2	1		1	1	1	1	1	1	2	1	1
12	3	3	4	2	4	5	5	4	4	3	4	3	4	2	2	4	3	3	4	3	3	4	4	5	4	3	5	4	5	5	4	1	1	4	2	1	1	4	1	1	4	1	4	2
13	5	4	4	4	2	4	2	2	4	2	3	1	2	2	2	4	4	4	3	3	3	3	3	4	3	3	6	6	7	6	6	1	1	4	1	2	1	4	1	3	2	2	4	2
14	1	3	2	2	4	3	4	1	1	1	3	1	2	1	2	3	3	5	4	2	3	1	2	3	3	3	4	3	2	2	2	1	1	4	2	1	1	4	1	3	1	2	3	2
15	5	4	4	4	2	4	2	2	4	2	3	1	2	2	2	4	2	4	3	3	3	3	3	3	3	3	6	6	6	4	6	1	1	3	2	1	1	3	1	2	1	2	3	2
16	4	4	5	3	2	2	3	1	3	3	3	1	5	4	5	3	5	3	3	5	3	5	4	3	4	5	4	3	3	4	1	1	1	4	2	2	1	4	1	3	5	1	3	2
17	4	2	1	2	4	5	5	4	4	3	4	3	4	2	2	4	3	3	4	3	3	4	5	4	4	3	5	5	5	5	4	1	2	1	1	2	1	1	1	1	4	1	3	1
18	3	4	4	2	3	3	3	3	4	2	3	4	3	3	3	4	3	2	3	4	2	4	4	4	3	4	5	4	4	4	3	1	1	2	2	1	1	2	1	3	4	1	2	2
19	2	3	4	2	5	4	5	3	3	2	2	1	3	1	1	1	2	1	3	5	3	5	5	5	5	4	1	1	2	3	7	1	1	4	2	1	1	4	1	1	4	1	4	2
20	1	3	5	5	3	2	2	1	1	1	1	1	1	1	1	1	2	1	2	1	1	1	1	2	1	5	1	2	1	1	1	1	1	4	1	2	2	4	2	1	4	1	4	2
21	2	1	1	2	4	5	5	3	2	1	5	3	4	1	1	2	1	1	3	4	4	5	4	4	4	3	2	2	2	6	4	1	1	4	1	1	1	4	1	3	2	2	4	2
22	4	5	3	2	4	2	3	3	2	3	4	3	4	3	3	2	4	3	4	4	2	4	3	4	3	3	6	5	5	4	4	2	1	3	1	2	1	3	1	1	2	2	2	1
23	4	2	4	2	4	5	5	2	2	2	2	1	2	2	2	4	2	3	3	4	3	4	4	3	3	3	4	4	2	2	6	1	1	4	2	1	1	4	1	1	3	1	4	1
24	1	3	2	2	4	3	4	1	1	1	3	1	2	1	3	2	3	3	5	4	2	3	1	5	3	3	4	2	2	2	2	1	1	4	1	2	1	4	1	2	2	2	3	2
25	4	5	3	2	4	2	3	3	2	3	4	3	4	3	3	2	4	3	4	4	2	4	3	4	3	3	6	6	5	4	4	2	1	3	1	1	1	3	1	1	4	1	1	2
26	4	5	3	2	4	2	3	3	2	3	4	3	4	3	3	2	4	3	5	4	2	4	3	4	3	3	6	6	5	4	4	2	1	3	1	2	1	3	1	1	2	2	2	1
27	1	1	2	2	1	1	1	1	2	1	3	1	3	1	1	2	3	2	3	5	5	5	5	5	5	4	5	1	3	3	7	1	1	4	1	2	1	4	1	1	1	2	3	1
28	4	5	3	2	2	3	3	3	2	3	4	3	4	3	3	2	4	3	4	4	2	4	3	4	3	3	5	6	4	4	4	2	1	4	2	1	1	4	1	1	3	1	4	2
29	2	3	4	2	5	4	5	3	3	2	2	1	3	1	1	1	2	1	3	5	3	5	5	5	5	4	4	1	2	3	7	1	1	4	2	1	1	4	1	1	4	1	4	2
30	4	3	2	2	4	4	4	3	4	2	3	2	4	4	2	3	3	4	3	4	4	3	4	4	4	3	2	2	2	2	2	1	1	4	2	1	1	4	1	3	1	2	3	2

## Sheet: GP
	1-How would you rate your quality of life?	2-How satisfied are you with your health?	3-To what extent do you feel that physical pain prevents you from doing what you need to do?	4-How much do you need any medical treatment to function in your daily life?	5-How much do you enjoy life?	6-To what extent do you feel your life to be meaningful?	7-How well are you able to concentrate?	8-How safe do you feel in your daily life?	9-How healthy is your physical environment?	10-Do you have enough energy for everyday life?	11-Are you able to accept your bodily appearance?	12-Have you enough money to meet your needs?	13-How available to you is the information you need in your daily life?	14-To what extent do you have the opportunity for leisure activities?	15How well are you able to get around physically?	16-How satisfied are you with your sleep?	17-How satisfied are you with your ability to perform your daily living activities?	18-How satisfied are you with your capacity for work	19-How satisfied are you with yourself?	20-How satisfied are you with your personal relationships?	21-How satisfied are you with your sex life?	22-How satisfied are you with the support you get from your friends?	23-How satisfied are you with the conditions of your living place?	24-How satisfied are you with your access to health services?	25-How satisfied are you with your transport?	26-How often do you have negative feelings such as blue mood, despair, anxiety or depression?	27-In most ways, my life is close to my ideal.	28-The conditions of my life are excellent.	29-I am satisfied with my life	30-So far, I have gotten the important things I want in life.	31-If I could live my life over, I would change almost nothing.
1	4	4	4	4	3	3	3	3	3	3	3	3	3	1	4	2	4	4	4	3	3	3	4	4	4	4	4	4	4	4	4
2	3	4	4	3	3	3	4	4	3	4	3	3	3	3	4	4	3	3	3	3	4	4	3	4	4	2	4	5	4	4	2
3	4	4	4	4	4	4	4	4	4	4	3	4	4	4	4	3	4	4	4	4	4	4	4	4	4	4	6	6	6	6	6
4	4	4	1	1	3	3	3	5	4	4	3	2	4	4	4	4	4	3	3	4	3	4	3	3	5	3	4	4	6	2	2
5	4	4	4	5	4	4	4	5	3	4	5	5	4	5	5	3	5	4	5	3	4	5	3	5	3	4	6	5	6	6	1
6	3	4	4	3	3	3	3	3	3	3	3	4	3	3	3	3	3	3	3	2	3	4	3	3	4	4	3	3	4	4	4
7	4	3	3	3	4	4	4	4	3	3	4	4	4	3	3	3	3	4	4	3	3	3	3	3	3	3	4	4	4	4	4
8	3	4	4	4	3	4	4	3	3	4	3	3	3	1	4	2	3	4	4	4	3	5	3	3	4	4	4	4	3	4	4
9	4	4	4	4	3	3	3	3	3	3	3	3	2	1	4	3	4	4	4	3	5	3	3	4	4	4	4	4	4	4	4
10	4	4	4	3	3	3	3	3	3	3	2	2	1	1	4	2	4	4	4	3	3	3	4	4	4	4	4	3	3	3	3
11	4	4	4	3	3	4	3	4	4	4	4	3	3	3	3	2	3	4	4	4	3	4	4	4	4	4	4	4	4	4	4
12	4	4	4	4	3	3	3	3	3	3	3	3	3	1	4	2	3	3	3	3	3	3	4	4	4	4	4	4	4	4	4
13	4	3	3	3	4	4	4	4	3	3	4	4	4	1	4	4	3	3	3	3	4	4	4	4	4	4	4	4	4	4	4
14	4	4	4	4	4	4	3	3	3	3	3	3	3	2	3	3	4	4	4	4	3	3	3	4	4	4	4	4	4	4	4
15	4	4	4	4	4	3	3	3	3	3	3	3	4	4	4	3	3	3	3	3	4	4	4	4	4	3	3	3	3	4	4
16	3	4	3	4	3	3	3	4	4	4	3	3	3	3	4	4	3	3	3	3	4	4	3	4	4	2	4	5	4	4	2
17	4	4	4	4	4	4	4	4	3	4	3	3	3	4	4	4	3	3	4	4	4	4	4	4	4	3	3	4	4	4	4
18	4	4	1	1	3	3	3	5	4	4	3	2	4	4	4	4	4	3	3	4	3	4	3	3	5	3	4	4	6	6	2
19	3	4	4	3	3	3	3	3	3	3	3	4	4	3	3	3	5	5	3	4	3	5	3	5	3	4	6	5	6	6	1
20	4	4	4	4	4	4	4	4	4	4	3	4	4	4	4	3	4	4	4	4	4	4	4	4	4	4	6	6	6	6	6
21	4	4	4	5	4	4	4	5	3	4	5	5	4	4	5	3	3	3	3	2	3	4	3	3	4	4	3	3	4	4	4
22	3	3	4	4	4	3	3	3	4	4	4	3	3	3	3	3	4	3	4	4	4	2	2	3	3	3	4	4	4	4	4
23	4	4	3	3	3	4	4	4	3	4	4	3	4	4	4	3	3	4	4	4	3	4	4	3	2	4	4	4	4	4	4
24	4	3	3	3	4	4	3	3	4	4	3	4	4	4	3	4	4	3	3	4	4	3	3	3	4	3	4	4	4	4	4
25	3	3	2	2	3	3	3	3	3	3	3	4	4	4	4	3	3	3	4	4	4	4	4	4	4	4	4	4	4	5	5
26	4	4	3	3	3	4	4	4	3	3	4	4	4	4	3	3	4	4	3	3	4	4	3	3	4	4	4	3	3	4	4
27	4	4	4	3	3	4	4	3	3	3	4	3	3	4	4	4	4	4	4	4	4	4	3	4	4	3	4	5	4	4	2
28	4	4	4	3	4	4	4	3	4	4	4	4	3	3	4	3	3	4	4	4	3	3	4	4	4	4	4	4	4	4	3
29	3	4	3	3	4	4	4	4	3	3	3	4	4	4	3	3	3	3	4	4	4	4	4	3	3	3	3	4	4	4	4
30	3	4	2	2	4	4	3	3	4	4	4	3	4	3	3	3	4	4	3	3	4	3	3	4	4	3	4	4	4	4	3
31	3	4	2	1	3	4	3	4	4	3	3	3	3	4	4	4	4	3	3	3	4	4	4	3	4	4	3	4	4	3	4
32	3	4	3	2	3	4	4	4	4	4	3	4	3	4	3	3	3	4	4	3	4	4	3	4	4	4	4	3	4	4	5
33	4	4	3	3	4	4	3	3	3	3	3	3	3	4	4	4	3	3	4	4	3	4	3	4	4	3	4	3	4	5	3
34	5	4	3	2	4	4	4	4	3	3	4	4	4	3	3	4	4	3	4	4	4	4	4	4	3	3	4	2	4	3	3
35	4	4	2	3	4	4	4	3	4	3	3	3	3	4	4	4	4	3	4	4	3	4	3	4	4	3	4	3	4	4	4
36	4	3	3	3	3	4	4	4	3	3	4	4	4	3	3	4	4	4	3	3	4	4	4	3	3	4	4	4	3	4	4
37	4	4	3	2	3	4	4	4	4	3	4	4	3	4	3	3	4	4	4	4	3	4	4	4	3	4	4	4	3	5	3
38	4	3	3	3	4	4	4	3	3	4	4	4	3	4	3	4	4	3	4	4	3	4	4	3	4	3	4	4	3	4	3
39	3	4	4	3	3	4	4	4	4	3	4	3	4	4	4	3	3	4	4	4	3	4	3	4	3	4	3	4	3	4	3
40	3	4	4	3	3	4	4	3	3	4	3	3	4	4	4	4	4	4	3	3	3	4	4	3	4	3	4	4	3	3	4
41	4	4	4	3	4	4	4	3	4	3	4	3	4	4	3	5	3	3	4	4	4	4	3	4	4	3	5	5	5	3	3
42	4	3	3	4	3	4	4	3	4	3	3	3	3	4	4	4	3	4	3	4	3	3	3	3	4	4	4	3	3	4	3
43	4	3	2	2	3	4	3	3	3	4	4	4	3	4	4	3	3	4	3	4	4	3	3	4	4	4	5	5	4	4	3
44	4	4	2	2	3	4	4	4	3	3	3	4	4	4	3	4	4	3	4	4	3	3	4	4	4	3	4	4	3	4	4
45	4	3	2	3	5	3	3	4	4	4	4	3	4	3	3	3	4	4	4	4	3	4	4	3	3	4	4	4	4	4	3
46	4	3	4	3	3	3	4	4	4	3	3	4	4	3	4	4	4	3	4	4	3	4	4	4	3	4	5	4	4	4	3
47	4	3	3	4	4	4	4	2	3	3	4	4	4	3	4	4	4	3	3	4	4	4	4	3	4	5	3	4	4	4	4
48	4	2	2	3	3	4	4	4	3	4	3	3	3	4	4	4	4	4	5	3	3	3	3	3	4	4	5	5	5	3	4
49	3	2	3	3	3	4	4	4	3	3	3	3	4	4	4	3	3	4	4	4	4	4	3	3	4	4	3	4	4	4	4
50	4	4	2	2	4	4	4	3	3	3	4	4	4	3	4	3	4	4	3	4	3	3	4	4	4	4	3	4	4	3	4
51	3	4	2	3	4	3	4	4	3	4	4	3	1	4	3	4	4	4	3	3	2	4	4	4	4	5	5	5	6	6	6
52	3	2	3	4	4	5	5	3	2	5	5	3	4	2	4	3	3	4	4	3	4	4	3	4	4	3	6	6	6	5	5
53	4	3	3	4	3	4	4	3	4	3	4	3	3	4	4	4	3	4	3	4	3	4	3	3	4	4	4	3	5	4	3
54	4	3	2	2	3	4	3	3	3	4	4	4	3	4	4	3	3	4	3	4	4	3	3	4	4	4	5	5	4	4	3
55	4	4	2	2	3	4	4	4	3	3	3	4	4	4	3	4	4	3	4	4	3	3	4	4	4	3	4	4	3	4	4
56	3	3	2	3	5	3	3	4	4	4	4	3	4	3	3	3	4	4	4	4	3	4	4	3	3	4	4	4	4	4	3
57	4	3	4	3	3	3	4	4	4	3	3	4	4	3	4	4	4	3	4	4	3	4	4	4	3	4	5	4	4	4	3
58	4	3	3	4	4	4	4	2	3	3	4	4	4	3	4	4	4	3	3	4	4	4	4	3	4	5	3	4	4	4	4
59	4	2	3	3	3	4	4	4	3	4	3	3	3	4	4	4	4	4	5	3	3	3	3	3	4	4	5	5	5	3	4
60	3	2	3	3	3	4	4	4	3	3	3	3	4	4	4	3	3	4	4	4	4	4	3	3	4	4	3	4	4	4	4
61	4	3	2	3	4	4	4	3	3	3	4	4	4	3	4	3	4	4	3	4	3	3	4	4	4	4	3	4	4	3	4
62	3	4	5	3	4	4	4	4	3	4	4	3	1	4	3	4	4	4	3	3	2	4	4	4	4	5	5	5	6	6	6
63	4	2	2	4	3	4	4	4	3	4	3	3	3	4	4	4	4	4	5	3	3	3	3	3	4	4	5	5	5	3	4
64	3	3	3	3	3	4	4	4	3	3	3	3	4	4	4	3	3	3	4	4	4	4	3	3	4	4	3	4	4	4	4
65	4	4	2	2	4	4	4	3	3	3	4	4	4	3	4	3	4	4	3	4	3	3	4	4	4	4	3	4	4	3	4
66	3	4	5	3	3	4	4	4	3	4	4	3	1	4	3	4	4	3	3	3	2	4	4	3	4	5	5	5	6	6	6
67	4	2	4	4	5	5	5	3	2	5	5	3	4	2	4	3	3	4	4	4	4	4	4	4	4	3	6	6	6	5	5
68	4	4	4	4	3	3	3	3	3	3	3	3	3	1	4	2	4	4	4	3	3	3	4	4	4	4	4	4	4	4	4
69	3	4	4	3	3	3	4	4	3	4	3	3	3	3	3	4	3	3	3	3	4	4	3	4	4	2	4	5	4	4	2
70	4	3	4	4	4	4	4	4	4	4	3	4	4	4	4	3	4	4	4	4	3	4	4	4	4	4	6	6	6	6	6
71	4	4	1	1	3	3	3	5	4	4	3	2	3	4	4	4	4	3	3	4	3	4	3	3	5	3	4	4	6	2	2
72	4	4	4	5	4	4	4	5	3	4	5	5	4	5	5	3	5	4	5	3	4	5	3	5	3	4	6	5	6	6	1
73	3	4	4	3	3	3	3	3	3	3	3	4	3	3	3	3	3	3	3	2	2	4	3	3	4	4	3	3	4	4	4
74	4	3	3	3	4	4	4	4	3	3	4	4	4	3	3	3	3	4	4	3	3	3	3	3	3	3	4	4	4	4	4
75	3	4	4	4	3	4	4	3	3	4	3	3	3	1	4	2	3	4	4	4	3	5	3	3	4	4	4	4	3	4	4
76	5	4	3	2	4	4	4	4	3	3	4	4	4	3	3	4	4	3	4	4	4	4	4	4	3	3	4	2	4	3	3
77	4	4	2	3	4	4	4	3	4	3	3	3	3	4	4	4	4	3	4	4	3	4	3	4	4	3	4	3	4	4	4
78	4	3	3	3	3	4	4	4	3	3	4	4	4	3	3	4	4	4	3	3	4	4	4	3	3	4	4	4	3	4	4
79	4	4	3	3	3	4	4	4	4	3	4	4	3	4	3	3	4	4	4	4	3	4	4	4	3	4	4	4	3	5	3
80	4	3	3	3	4	4	4	3	3	4	4	4	3	4	3	4	4	3	4	4	3	4	4	3	4	3	4	4	3	4	3
81	3	4	4	4	3	4	4	4	4	3	4	3	4	4	4	3	3	4	4	4	3	4	3	4	3	4	3	4	3	4	3
82	3	4	4	3	3	4	4	3	3	4	3	3	4	4	4	4	4	4	3	3	4	4	4	3	4	3	4	4	3	3	4
83	4	4	4	3	4	4	4	3	4	3	4	3	4	4	3	5	3	3	4	4	4	4	3	4	4	3	5	5	5	3	3
84	4	3	3	4	3	4	4	3	4	3	3	3	3	4	4	4	3	4	3	4	3	3	3	3	4	4	4	3	3	4	3
85	4	3	2	2	3	4	3	3	3	4	4	4	3	4	4	3	5	4	3	4	4	3	4	4	4	4	5	5	4	4	3
86	4	4	4	3	4	4	4	3	4	3	4	3	4	4	3	5	3	3	4	4	4	4	3	4	4	3	5	5	5	3	3
87	4	3	3	4	3	4	4	3	4	3	3	3	3	4	4	4	3	4	3	4	3	3	3	3	4	4	4	3	3	4	3
88	4	3	2	2	3	4	3	3	3	4	4	4	3	4	4	3	3	4	3	4	4	3	3	4	4	4	5	5	4	4	3
89	4	4	2	2	4	4	4	4	3	3	3	4	4	4	3	4	4	3	4	3	3	3	4	4	4	3	4	4	3	4	4
90	4	3	2	3	5	3	3	4	4	4	4	3	4	3	3	3	4	4	4	4	3	4	4	3	3	4	4	4	4	4	3
91	3	3	4	3	3	3	4	4	4	3	3	4	4	3	4	4	4	3	4	4	3	4	4	4	3	4	5	4	4	4	3
92	4	3	3	4	4	4	4	2	3	3	4	4	4	3	4	4	4	3	3	4	4	4	4	3	4	5	3	4	4	4	4
93	4	2	2	3	3	4	4	4	3	4	3	3	3	4	4	4	4	4	5	3	3	3	3	3	4	4	5	5	5	3	4
94	3	2	3	3	3	4	4	4	3	3	3	3	4	4	4	3	3	4	4	4	4	4	3	3	4	4	3	4	4	4	4
95	4	4	2	2	4	4	4	3	3	3	4	4	4	3	4	3	4	4	3	4	3	3	4	4	4	4	3	4	4	3	4
96	3	3	5	3	4	4	4	4	3	4	4	3	1	4	3	4	4	4	3	3	2	4	4	4	4	5	5	5	6	6	6
97	4	2	5	4	5	5	5	3	2	5	5	3	4	2	4	3	3	4	4	4	4	4	4	4	4	3	6	6	6	5	5
98	4	3	3	4	3	4	4	3	4	3	3	3	3	4	4	4	3	4	3	4	3	3	3	3	4	4	4	3	3	4	3
99	4	3	2	2	3	4	3	3	3	4	4	4	3	4	4	3	3	4	3	4	4	3	3	4	4	4	5	5	4	4	3
100	3	4	2	2	3	4	4	4	3	3	3	4	4	4	3	4	4	3	4	4	3	3	4	4	4	3	4	4	3	4	4
101	4	3	2	3	5	3	3	4	4	4	4	3	4	3	3	3	4	4	4	4	3	4	4	3	3	4	4	4	4	4	3
102	4	3	4	3	3	3	4	4	4	3	3	4	4	3	4	4	4	3	4	4	3	4	4	4	3	4	5	4	4	4	3
103	4	3	3	4	4	4	4	2	3	3	4	4	4	3	4	3	4	3	3	4	4	4	4	3	4	5	3	4	4	4	4
104	3	4	5	3	4	4	4	4	3	4	4	3	1	4	3	4	4	4	3	3	2	4	4	4	4	5	5	5	6	6	6
105	4	2	2	3	3	4	4	4	3	4	3	3	3	4	4	4	4	4	5	3	3	3	3	3	4	4	5	5	5	3	4
106	3	2	3	3	3	4	4	4	3	3	3	3	4	4	4	3	3	4	4	4	4	4	3	3	4	4	3	4	4	4	4
107	4	4	2	2	4	4	4	3	3	4	4	4	4	3	4	3	4	4	3	4	3	3	4	4	4	4	3	4	4	3	4
108	3	3	5	3	4	4	4	4	3	4	4	3	1	3	3	4	4	4	3	3	3	4	4	4	4	5	5	5	6	6	6
109	3	2	5	4	5	5	5	3	2	5	5	3	4	2	4	3	3	4	4	4	4	4	3	4	4	3	6	6	6	5	5
110	4	4	4	4	3	3	3	3	3	3	3	3	3	1	4	2	4	4	4	3	3	3	4	4	4	4	4	4	4	4	4
111	3	3	4	3	3	3	4	4	3	4	3	3	3	3	4	4	3	3	3	3	4	4	3	4	4	2	4	5	4	4	2
112	4	4	4	4	4	4	4	4	4	4	3	4	4	4	4	3	4	4	4	4	4	4	4	4	4	4	6	6	6	6	6
113	4	4	1	2	3	3	3	5	4	4	3	2	4	4	4	4	4	3	3	4	3	4	3	3	5	3	4	4	6	4	2
114	4	4	4	5	4	4	4	5	3	4	5	5	4	5	5	3	5	4	5	3	4	5	3	5	3	4	6	5	6	6	1
115	3	4	4	3	3	3	3	3	3	3	3	4	3	3	3	3	3	3	3	2	2	4	3	3	4	4	3	3	4	4	4
116	4	3	3	3	4	4	4	4	3	3	4	4	4	3	3	3	3	4	4	3	3	3	4	3	3	3	4	4	4	4	4
117	3	4	4	4	3	4	4	3	3	4	3	3	3	1	4	2	3	4	4	4	3	5	3	3	4	4	4	4	3	4	4
118	5	4	3	2	4	4	4	4	3	3	4	4	4	3	3	4	4	3	4	4	4	4	4	4	3	3	4	2	4	3	3
119	4	4	2	3	4	4	4	3	4	3	3	3	3	4	4	4	4	3	4	4	3	4	3	4	4	3	4	3	4	4	4
120	4	3	3	3	3	4	4	4	3	3	4	4	4	3	3	4	4	4	3	3	4	4	4	3	3	4	4	4	3	4	4
121	4	4	3	2	3	4	4	4	4	3	4	4	3	4	3	3	4	4	4	4	3	4	4	4	3	4	4	4	3	5	3
122	4	3	3	3	4	4	4	3	3	4	4	4	3	4	3	4	4	3	4	4	3	4	4	3	4	3	4	4	3	4	3
123	3	4	4	3	3	4	4	4	4	3	4	3	4	4	4	3	3	4	4	4	3	4	3	4	3	4	3	4	3	4	3
124	4	3	2	3	5	3	3	4	4	4	4	3	4	3	3	3	4	4	4	4	3	4	4	3	3	4	4	4	4	4	3
125	4	3	4	3	3	3	4	4	4	3	3	4	4	3	4	4	4	3	4	4	3	4	4	4	3	4	5	4	4	4	3
126	4	3	3	4	4	4	4	2	3	3	4	4	4	3	4	4	4	3	3	4	4	4	4	3	4	5	3	4	4	4	4
127	4	2	2	3	3	4	4	4	3	4	3	3	3	4	4	4	4	4	5	3	3	3	3	3	3	4	5	5	5	3	4
128	3	2	3	3	3	4	4	4	3	3	3	3	4	4	4	3	3	4	4	4	4	4	3	3	4	4	3	4	4	4	4
129	4	4	2	2	4	4	4	3	3	3	4	4	4	3	4	3	4	4	3	4	3	3	4	4	4	4	3	4	4	3	4
130	3	4	5	3	4	4	4	4	3	4	4	3	1	4	3	4	4	4	3	3	2	4	4	4	4	5	5	5	6	6	6
131	3	2	5	4	5	5	5	3	2	5	5	3	4	2	4	3	3	4	4	4	4	4	4	4	4	3	6	6	6	5	5
132	4	4	4	4	4	4	4	4	3	4	3	3	3	4	4	4	3	3	4	4	4	4	4	4	4	3	3	4	4	4	4
133	4	4	1	1	3	3	3	5	4	4	3	2	4	4	4	4	4	3	3	4	3	4	3	3	5	3	4	4	6	6	2
134	3	4	4	3	3	3	3	3	3	3	3	4	4	3	3	3	5	5	3	4	3	5	3	5	3	4	6	5	6	6	1
135	4	4	4	4	4	4	4	4	4	4	3	4	4	4	4	3	4	4	4	4	4	4	4	4	4	4	6	6	6	6	6
136	4	4	4	5	4	4	4	5	3	4	5	5	4	5	5	3	3	3	3	3	2	4	3	3	4	4	3	3	4	4	4
137	3	3	4	4	4	3	3	3	4	4	4	3	3	3	3	3	4	3	4	4	4	2	2	3	3	3	4	4	4	4	4
138	4	4	3	3	3	4	4	4	3	4	4	3	4	4	4	3	3	4	4	4	3	4	4	3	2	4	4	4	4	4	4
139	4	3	3	3	4	4	3	3	4	4	3	4	4	4	3	4	4	3	3	4	4	3	3	3	4	3	4	4	4	4	4
140	3	3	2	2	3	3	3	3	3	3	3	4	4	4	4	3	3	3	4	4	4	4	4	4	4	4	4	4	4	5	5
141	4	4	3	3	3	4	4	4	3	3	4	4	4	4	3	3	4	4	3	3	4	4	3	3	4	4	4	3	3	4	4
142	4	4	4	3	3	4	4	3	3	3	4	3	3	4	4	4	4	4	4	4	4	4	3	4	4	3	4	5	4	4	2
143	4	4	4	3	4	4	4	3	4	4	4	4	3	3	4	3	3	4	4	4	3	3	4	4	4	4	4	4	4	4	3
144	3	4	3	3	4	3	4	4	3	3	3	4	4	4	3	4	3	3	4	4	4	4	4	3	3	3	3	4	4	4	4
145	3	4	2	2	4	4	3	3	4	4	4	3	4	3	3	3	4	4	3	3	4	3	3	4	4	3	4	4	4	4	3
146	3	4	2	1	3	4	3	4	4	3	3	3	3	4	4	4	4	3	3	3	4	4	4	3	4	4	3	4	4	3	4
147	3	4	3	2	3	4	4	4	4	4	3	4	3	4	3	3	3	4	4	3	4	4	3	4	4	4	4	3	4	4	5
148	4	4	3	3	4	4	3	3	3	3	3	3	3	4	4	4	3	3	4	4	3	4	3	4	4	3	4	3	4	5	3
149	5	4	3	2	4	3	4	4	3	3	4	4	4	3	3	4	4	4	4	4	4	3	4	4	3	3	4	2	4	3	3
150	4	4	2	3	4	4	4	3	4	3	3	3	3	4	4	4	4	3	4	4	3	4	3	4	4	3	4	3	4	4	4
151	4	3	3	3	3	4	4	4	3	3	4	4	4	3	3	4	4	4	3	3	4	4	4	3	3	4	4	4	3	4	4
152	4	4	3	2	3	4	4	4	4	3	4	4	3	4	4	3	4	4	4	4	3	4	4	4	3	4	4	4	3	5	3
153	4	3	3	3	4	4	4	3	3	4	4	4	3	4	3	4	4	3	4	4	3	4	4	3	4	3	4	4	3	4	3
154	3	4	4	3	3	4	4	4	4	3	4	3	4	4	4	3	3	4	4	4	3	4	3	4	3	4	3	4	3	4	3
155	3	4	4	3	3	4	4	3	3	4	3	3	4	4	4	4	4	4	3	3	3	4	4	3	4	3	4	4	3	3	4
156	4	4	4	3	4	4	4	3	4	3	4	4	4	4	3	5	3	3	4	4	4	4	3	4	4	3	5	5	5	3	3
157	4	3	3	4	3	4	4	3	4	4	3	3	3	4	4	4	3	4	3	4	3	3	3	3	4	4	4	3	3	4	3
158	4	3	2	2	3	4	3	3	3	4	4	4	3	4	4	3	3	4	3	4	4	3	3	4	4	4	5	5	4	4	3
159	4	4	2	2	3	4	4	4	3	3	3	4	4	4	3	4	4	3	4	4	3	3	4	4	4	3	4	4	3	4	4
160	4	3	2	3	5	3	3	4	4	4	4	3	4	3	3	3	4	4	4	4	3	4	4	3	3	4	4	4	4	4	3
161	4	3	4	3	3	3	4	4	4	3	3	4	4	3	4	4	4	3	4	4	3	4	4	4	3	4	5	4	4	4	3
162	4	3	3	4	4	4	4	2	3	3	4	4	4	3	4	4	4	3	3	4	4	4	4	3	4	5	3	4	4	4	4
163	4	2	2	3	3	4	4	4	3	4	3	3	3	4	3	4	4	4	5	3	3	3	3	3	4	4	5	5	5	3	4
164	3	2	3	3	3	4	4	4	3	3	3	3	4	4	4	3	3	4	4	4	4	4	3	3	4	4	3	4	4	4	4
165	4	4	2	2	4	4	4	3	3	3	4	4	4	3	4	3	4	4	3	4	3	3	4	4	4	4	3	4	4	3	4
166	3	4	2	3	4	3	4	4	3	4	4	3	1	4	3	4	4	4	3	3	3	4	4	4	4	5	5	5	6	6	6
167	3	2	3	4	4	5	5	3	2	3	5	3	4	2	4	3	3	4	4	3	4	4	3	4	4	3	6	6	6	5	5
168	4	3	3	4	3	4	4	3	4	3	4	3	3	4	4	4	3	4	3	4	3	4	3	3	4	4	4	3	5	4	3
169	4	3	2	2	3	4	3	3	3	4	4	4	3	4	4	3	3	4	3	4	4	3	3	4	4	4	5	5	4	4	3
170	4	4	2	2	3	4	4	4	3	3	3	4	4	4	3	4	4	3	4	4	3	3	4	4	4	3	4	4	3	4	4
171	3	3	2	3	5	3	3	4	4	4	4	3	4	3	3	3	4	4	4	4	5	4	4	3	3	4	4	4	4	4	3
172	4	3	4	3	3	3	4	4	4	3	3	4	4	3	4	4	4	3	4	4	3	4	4	4	3	4	5	4	4	4	3
173	4	3	3	4	4	4	4	2	3	3	4	4	4	3	4	4	4	3	3	4	4	4	4	3	4	5	3	4	4	4	4
174	4	2	3	3	3	4	4	4	3	4	3	3	3	4	4	4	4	4	5	3	3	3	3	3	4	4	5	5	5	3	4
175	3	2	3	3	3	4	4	4	3	3	3	3	4	4	4	3	3	4	4	4	4	4	3	3	4	4	3	4	4	4	4
176	4	3	2	2	4	4	4	3	3	3	4	4	4	3	4	3	4	4	3	4	3	3	4	4	4	4	3	4	4	3	4
177	3	4	5	3	4	4	4	4	3	4	4	3	3	4	3	4	4	4	3	3	2	4	4	4	4	5	5	5	6	6	6
178	4	2	2	4	3	4	4	4	3	4	3	3	3	4	4	4	4	4	5	3	3	3	3	3	4	4	5	5	5	3	4
179	3	3	3	3	3	4	4	4	3	3	3	3	4	4	4	3	3	4	4	4	4	4	3	3	4	4	3	4	4	4	4
180	4	4	2	2	4	4	4	3	3	3	4	4	4	3	4	3	4	4	3	4	3	3	4	4	4	4	3	4	4	3	4
181	3	4	5	3	4	4	4	4	3	4	4	3	1	4	3	4	4	4	3	3	2	4	4	4	4	5	5	5	6	6	6
182	4	2	4	4	5	5	5	3	2	5	5	3	4	2	4	3	3	4	4	4	4	4	4	4	4	3	6	6	6	5	5
183	4	4	4	4	3	3	3	3	3	3	3	3	3	1	4	2	4	4	4	3	3	3	4	4	4	4	4	4	4	4	4
184	3	4	4	3	3	3	4	4	3	4	3	3	3	3	4	4	3	3	3	3	4	4	3	4	4	2	4	5	4	4	2
185	4	3	4	4	4	4	4	4	4	4	3	4	4	4	4	3	4	4	4	4	4	4	4	4	4	4	6	6	6	6	6
186	4	4	1	1	3	3	3	5	4	4	3	2	4	4	4	4	4	3	3	4	3	4	3	3	5	3	4	4	6	2	2
187	4	4	4	5	4	4	4	5	3	4	5	3	4	5	5	3	5	4	5	3	4	5	3	5	3	4	6	5	6	6	1
188	3	4	4	3	3	3	3	3	3	3	3	4	3	3	3	3	3	3	3	4	2	4	3	3	4	4	3	3	4	4	4
189	4	3	3	3	4	4	4	4	3	3	4	4	4	3	3	3	3	4	4	3	3	3	3	3	3	3	4	4	4	4	4
190	3	4	4	4	3	4	4	3	3	4	3	3	3	1	4	2	3	4	4	4	3	5	3	3	4	4	4	4	3	4	4
191	5	4	3	2	4	4	4	4	3	3	4	4	4	3	3	4	4	3	4	3	4	4	4	4	3	3	4	2	4	3	3
192	4	4	2	3	4	4	4	3	4	4	3	3	3	4	4	3	3	3	4	4	3	4	3	4	4	3	4	3	4	4	4
193	4	3	3	4	3	4	4	4	3	3	4	4	4	3	3	4	4	4	3	3	4	4	4	3	3	4	4	4	3	4	4
194	4	2	3	3	3	4	3	4	3	4	3	3	3	4	4	3	4	4	5	3	4	3	3	3	4	4	5	5	5	3	4
195	3	2	3	3	3	4	4	4	4	3	3	3	4	4	4	3	3	4	4	3	4	4	3	3	4	4	3	4	4	4	4
196	4	3	2	2	4	4	4	3	3	3	4	4	4	3	4	3	4	4	3	4	3	3	4	4	4	4	3	4	4	3	4
197	3	4	4	3	4	4	4	4	3	4	4	3	3	4	3	4	4	4	3	3	3	4	4	4	4	5	5	5	6	6	6
198	4	2	2	4	3	4	4	4	3	4	3	3	3	4	3	4	4	4	5	3	4	3	3	3	4	4	5	5	5	3	4
199	4	3	3	3	3	4	3	4	3	3	3	3	4	4	4	3	3	4	3	4	4	4	3	3	4	4	3	4	4	4	4
200	4	4	2	2	4	4	4	3	3	3	4	4	4	3	4	3	4	4	3	4	3	3	4	3	4	4	3	4	4	3	4
201	3	4	5	3	4	4	4	4	3	4	4	3	3	4	3	4	3	4	3	3	3	4	4	4	4	5	5	5	6	6	6
202	4	2	4	4	5	5	5	3	2	5	5	3	4	2	4	3	3	4	4	4	4	4	4	4	4	3	6	6	6	5	5
203	4	3	3	4	3	3	3	4	3	3	3	3	3	2	4	2	4	4	4	5	3	3	4	4	4	4	4	4	4	4	4
204	3	4	4	3	3	3	4	4	3	4	3	3	3	3	4	4	3	3	3	3	4	4	3	4	4	2	4	5	4	4	2
205	4	3	4	4	4	4	4	4	4	4	3	4	4	4	4	3	4	4	4	4	4	4	4	4	4	4	6	6	6	6	6
206	4	4	1	1	3	3	3	5	4	4	3	2	4	4	4	4	4	3	3	4	3	4	3	3	5	3	4	4	6	2	2
207	4	4	4	5	4	4	4	5	3	4	5	3	4	5	5	3	5	4	5	3	4	5	3	5	3	4	6	5	6	6	1
208	4	2	5	4	5	5	5	3	2	5	5	3	4	2	4	3	3	4	4	4	4	4	4	4	4	3	6	6	6	5	5
209	4	3	3	4	3	4	4	3	4	3	3	3	3	4	4	4	3	4	3	4	3	3	3	3	4	4	4	3	3	4	3
210	4	3	2	2	3	4	3	3	3	4	4	4	3	4	4	3	3	4	3	4	4	3	3	4	4	4	5	5	4	4	3
211	3	4	2	2	3	4	4	4	3	3	3	4	4	3	3	4	4	3	4	4	3	3	4	4	4	3	4	4	3	4	4
212	4	3	2	3	5	3	3	4	4	4	4	3	4	3	3	3	4	4	4	4	3	4	4	3	3	4	4	4	4	4	3
213	4	3	4	3	3	3	4	4	4	3	3	4	4	3	4	4	4	3	4	4	3	4	4	4	3	4	5	4	4	4	3
214	4	3	3	4	4	4	4	2	3	3	4	4	4	3	4	3	4	3	3	4	4	4	4	3	4	5	3	4	4	4	4
215	3	4	5	3	4	4	4	4	3	4	4	3	3	4	3	4	4	4	3	3	4	4	4	4	4	5	5	5	6	6	6
216	4	2	2	3	3	4	4	4	3	4	3	3	3	4	4	4	4	4	5	3	3	3	3	3	4	4	5	5	5	3	4
217	3	2	3	3	3	4	4	4	3	3	3	3	4	4	4	3	3	4	4	4	4	4	3	3	4	4	3	4	4	4	4
218	4	4	2	2	4	4	4	3	3	4	4	4	4	3	4	3	4	4	3	4	3	3	4	4	4	4	3	4	4	3	4
219	3	3	5	3	4	4	4	3	3	4	4	3	1	3	3	4	4	4	3	3	3	4	4	3	4	5	5	5	6	6	6
220	3	2	5	4	5	5	5	3	2	5	5	3	4	2	4	3	3	4	4	4	4	4	3	4	4	3	6	6	6	5	5
221	4	4	4	4	3	4	3	3	3	3	3	4	3	2	4	2	4	4	4	3	3	3	4	4	4	4	4	4	4	4	4
222	3	3	4	3	3	3	4	4	3	4	3	3	3	3	4	4	3	3	3	3	4	4	3	4	4	2	4	5	4	4	2
223	4	4	4	4	4	4	4	4	4	4	3	4	4	4	4	3	4	4	4	4	4	4	4	5	4	4	6	6	6	6	6
